# Supplementary material
Source: PubMed Central journal article supplement (PMC5658248)
Supplement: NIHMS892293-supplement-Methods_and_Material.pdf [file NIHMS892293-supplement-Methods_and_Material.pdf]

## Materials and Methods

### Animals

We generated experimental mice by mating male mice hemizygous for the *Acta2-CreER<sup>T2</sup>* transgene<sup>1</sup> and homozygous for a floxed *Tgfb2* allele (exon 4),<sup>2</sup> with female mice homozygous for the floxed *Tgfb2* allele.<sup>3</sup> All experimental mice were *Tgfb2*<sup>fl<sup>ox</sup>/fl<sup>ox</sup></sup> and either *Acta2-Cre ER<sup>T2 +/0</sup>* or *Acta2-Cre ER<sup>T2 0/0</sup>*. All alleles were extensively backcrossed (>10 generations) into the C57BL/6 background. We chose the *Acta2-Cre ER<sup>T2</sup>* allele<sup>1</sup> rather than the *Myh11-Cre ER<sup>T2</sup>* allele<sup>4</sup> because *Acta2-Cre ER<sup>T2</sup>* is autosomal, permitting experiments in both male and female mice. Moreover, these 2 alleles have equivalent efficiency and specificity in our hands and in those of others.<sup>5, 6</sup> Mice were housed in a specific-pathogen-free facility, and fed normal chow. Experimental mice were enrolled at 6 weeks of age and euthanized between 9 and 13 weeks of age. Mice of both sexes were enrolled in approximately equal proportions, as further described in Results. All procedures were approved by the University of Washington Office of Animal Welfare.

### Genotyping

Mice were genotyped by PCR performed on tail-tip DNA. *Tgfb2* was genotyped by heating samples to 95°C for 3 minutes, then 37 cycles at 95 °C for 20 seconds, 62 °C for 30 seconds, and 72 °C for 40 seconds. The final step was 72 °C for 7 minutes. Primers were P1: 5'-TATGGACTGGCTGCTTTTGTATTC-3', P2: 5'-TGGGGATAGAGGTAGAAAGACATA-3' and P3: 5'-TATTGGGTGTGGTTGTGGACTTTA-3'. *Acta2-CreER<sup>T2</sup>* was detected by heating samples to 94 °C for 3 minutes, then 43 cycles of 94 °C for 1 minute, 65 °C for 1 minute, and 72 °C for 1 minute. The final step was 72 °C for 5 minutes. Primers were P1: 5'-CCAAAATTTGCCTGCATTACCGGTCGATGC-3' and P2: 5'-AGCGCCGTAATCAATCGATGAGTTGCTTC-3'. The R26R allele was detected by heating samples to 94 °C for 3 minutes, then 29 cycles of 94 °C for 30 seconds, 62 °C for 30 seconds, and 68 °C for 1 minute. The final step was 68 °C for 3 minutes. Primers were P1: 5'-AAAGTCGCTCTGAGTTGTTAT-3', P2: 5'-GCGAAGAGTTTGTCTCAACC-3', and P3: 5'-GGAGCGGGAGAAATGGATATG-3'

### Tamoxifen injections and minipump implantation

All experimental mice were injected intraperitoneally with tamoxifen (tamoxifen free base, #T5648; Sigma-Aldrich, St. Louis, MO). Tamoxifen (2.5 mg) was suspended in 250 µL of vehicle (sterile olive oil with 5% ethanol). Injections were begun at 6 weeks of age and continued daily for 5 days. 14 days after the last injection, all mice were implanted with osmotic minipumps (ALZET model 2004, ALZET Osmotic Pumps, Cupertino, CA) containing angiotensin, as described previously.<sup>7</sup> Briefly, angiotensin II (# A9525; Sigma-Aldrich) was equilibrated to room temperature and dissolved in sterile saline to a stock concentration of 10 mg/mL. The stock was further diluted in saline according to the weight of each mouse, lot-specific release rate, and fill volume of the pump so that 1000 ng/kg/min Ang II was delivered for 28 days. The minipumps were loaded according to the manufacturer's instructions and primed in saline for 24 hours at 37 °C. For pump implantation, mice were anesthetized with isoflurane (5% for induction and 1 – 2% for maintenance). Minipumps were implanted subcutaneously on the dorsal neck/upper back.

### Blood pressure measurements

Blood pressure was measured noninvasively in non-anesthetized animals, using the CODA Non-Invasive Blood Pressure System (Kent Scientific, Torrington, CT), essentially as described.<sup>8</sup> Mice were placed into a rodent tube holder on a warming platform and allowed to acclimate. When the surface temperature of the tail was 32 – 35 °C, the

55 occlusion cuff and volume pressure recorder sensor were placed on the tail. Blood  
56 pressure was measured on 20 consecutive cycles, with 30 seconds between cycles.  
57 Mice in the blood-pressure cohort were all injected with tamoxifen and implanted with  
58 Ang II-releasing minipumps at 6 and 8 weeks of age, respectively. Blood pressure was  
59 measured 2 and 4 weeks after beginning Ang II infusion.

### 60 61 **Injection of TGF- $\beta$ neutralizing antibody**

62 Hybridoma cells that produce an antibody that neutralizes TGF- $\beta$  (clone 2G7)<sup>9</sup> were  
63 kindly provided by Dr. Ziad Mallat (Cambridge University).<sup>10</sup> Cells were grown in a  
64 humidified incubator at 37 °C, 5% CO<sub>2</sub> in a 1:1 mixture of DMEM and F12 medium  
65 (#11320-033; Gibco, Thermo Fisher Scientific, Waltham, MA,) with 10% fetal bovine  
66 serum. Cells were grown to confluence and fed with serum-free medium. Medium was  
67 collected after 48 – 72 hours, loaded on a protein G Sepharose column (# 10-1243  
68 Invitrogen, Thermo Fisher Scientific), and eluted with 0.2 M glycine pH 2.0 into 1/10  
69 volume 1M Tris pH 8.0. Eluted antibody was dialyzed against PBS (pH 7.4), aliquoted,  
70 stored at –80 °C and thawed only once (upon use). After the initial dosing study (see  
71 below), we injected mice intraperitoneally with 10 mg/kg of this antibody or with the same  
72 dose of endotoxin-free mouse IgG (# IR-MS-GF-ED Innovative Research, Novi, MI).  
73 Antibody injections were begun on the day of minipump implantation and repeated every  
74 3 days until the mice were euthanized.

### 75 76 **Measurement of serum TGF- $\beta$ 1, - $\beta$ 2, and - $\beta$ 3**

77 To test whether the anti-TGF- $\beta$  antibody clone 2G7 blocked TGF- $\beta$ 1 activity in vivo, we  
78 injected mice (n=4 per group, 2 male and 2 female) intraperitoneally with 250  $\mu$ L of  
79 either saline-diluted anti-TGF- $\beta$  antibody (10, 15, or 20 mg/kg) or saline alone. This was  
80 essentially a repeat of a similar experiment reported by Wang et al., an important  
81 precedent for our study.<sup>10</sup> Injections were given 3 times, with each injection separated  
82 by 3 days. Twenty-four hours after the third injection, mice were deeply anesthetized  
83 with ketamine and xylazine, blood was collected by cardiac puncture after thoracotomy,  
84 and mice were euthanized by exsanguination. Blood was allowed to clot for 2 hours at  
85 room temperature, then centrifuged at 4 °C for 10 minutes (2,040 x g). Serum was  
86 collected, aliquoted and stored at -80 °C. Aliquots were thawed only once (upon use).  
87 Serum TGF- $\beta$ 1 was measured with an ELISA kit that detects active TGF- $\beta$ 1 (TGF- $\beta$ 1 kit  
88 # MB100B, R&D Systems, Minneapolis, MN). To measure total TGF- $\beta$ 1, 40  $\mu$ L of serum  
89 was acidified with 10  $\mu$ L of 1N HCl for 10 minutes at room temperature and neutralized  
90 with 10  $\mu$ L 1.2 N NaOH, 0.5 M HEPES to a pH between 7.2 and 7.6. Samples were then  
91 diluted according to the manufacturer's instructions, and TGF- $\beta$ 1 was measured by  
92 ELISA. We selected the 10 mg/kg dose of 2G7 antibody for our study because it  
93 produced a significant reduction in serum TGF- $\beta$ 1 in this experiment and because we  
94 anticipated that this dose would allow the collection of specimens for histologic analysis.  
95 Wang et al reported that a 20 mg/kg dose of 2G7 caused 100% aneurysm prevalence  
96 and 80% mortality, whereas a 10 mg/kg dose caused 80% aneurysm prevalence and  
97 40% mortality. Because we aimed to perform tissue analyses on perfusion-fixed aortas,  
98 we decided against using the 20 mg/kg dose because—based on Wang et al's results—  
99 most of the mice would be expected to die suddenly, precluding proper collection of  
100 tissue for analysis.

101  
102 As our study neared completion, a concern was raised about the ability of the 2G7  
103 antibody to block all isoforms of TGF- $\beta$  (TGF- $\beta$ 1, - $\beta$ 2 and - $\beta$ 3) in the context of Ang II  
104 stimulation. To address this concern, we implanted Ang II pumps in 2 groups of mice (9-  
105 10 per group). We treated 1 group with 2G7 (250  $\mu$ L = 10 mg/kg) and the second group  
106 with the same volume and dose of saline-diluted endotoxin-free mouse IgG. Injections  
107 were given 3 times, with each injection separated by 3 days. The control group included  
108 5 males and 5 females and the 2G7 group included 6 males and 3 females. Twenty-four

109 hours after the third injection, mice were deeply anesthetized with ketamine and  
110 xylazine, blood was collected by cardiac puncture after thoracotomy, mice were  
111 euthanized by exsanguination, and serum was generated, as described above. Total  
112 serum TGF- $\beta$ 1 was measured by ELISA (described above) and total TGF- $\beta$ 2 and - $\beta$ 3  
113 were also measured with ELISA kits (TGF- $\beta$ 2 kit #MB200 R&D Systems, Minneapolis,  
114 MI; TGF- $\beta$ 3 kit # EK1104; Boster Biological Technology Co, Pleasanton, CA) according  
115 to the manufacturer's instructions.

116

### 117 **In vitro testing of anti-TGF- $\beta$ antibody clones 2G7 and 1D11**

118 To test whether TGF- $\beta$ 1, - $\beta$ 2, and - $\beta$ 3 are inhibited in vitro by anti-TGF- $\beta$  antibodies  
119 commonly used in vascular research [clones 1D11 (R&D Systems) and 2G7], 250 pg/mL  
120 of recombinant TGF- $\beta$ 1, - $\beta$ 2 or - $\beta$ 3 (supplied with the ELISA kits listed above) were  
121 incubated without or with increasing concentrations (1, 10, 30, 100, and 300  $\mu$ g/mL) of  
122 2G7 antibody, 1D11 antibody, or control mouse IgG for 90 minutes at room temperature.  
123 ELISAs for all three TGF- $\beta$  isoforms were performed according to the manufacturer's  
124 instructions.

125

### 126 **Tissue fixation and storage**

127 Mice in the aneurysm study (Figure 1) were deeply anesthetized and exsanguinated by  
128 saline perfusion. Aortas were then fixed in situ by perfusion at physiologic pressure with  
129 10% formalin, excised along with the attached heart, incubated in 10% formalin  
130 overnight, and stored at 4 °C in 70% ethanol. Adipose tissue surrounding the aorta and  
131 heart was removed using forceps and a stereomicroscope (Wild M3Z, Leica  
132 Microsystems, Buffalo Grove, IL). The hearts and aortas were removed from 70%  
133 ethanol and photographed in a dissection dish (#DD-90-S; Living Systems  
134 Instrumentation, St. Albans, VT) using a digital camera attached to the stereomicroscope  
135 (model DFC295, Leica Microsystems).

136

### 137 **Measurement of maximal abdominal aortic diameter**

138 Explanted aortas were fixed to the bottom of a silicone-covered dissection dish by  
139 placement of pins in the heart and great vessels. The distal aorta was then rotated as  
140 needed so that the maximal diameter of the abdominal aorta was parallel to the bottom  
141 of the dish. Pins were inserted to fix the specimen to the dish in this position. The  
142 abdominal aorta was then photographed with a ruler alongside. This image was later  
143 used, with computer-assisted planimetry, to measure the maximal external diameter of  
144 the abdominal aorta. The maximal aortic diameter was measured as the distance from  
145 one edge of the adventitia to the opposite edge. An observer, blinded to the  
146 experimental groups, made this measurement at the site of maximal dilation, in a plane  
147 orthogonal to the major aortic axis at this site; the location of this site varied among  
148 animals. Because of a technical error made during specimen preparation, one mouse in  
149 the SMC-specific TBR11 loss group was excluded from maximal abdominal aortic  
150 diameter measurement. To assess the inter-observer reproducibility of maximal external  
151 diameter measurements, we assigned a second observer to re-measure the diameter in  
152 a group of 38 randomly chosen abdominal aortas. The range of these measurements  
153 was 0.9–4.5 mm. The mean difference between measurements obtained by the first and  
154 second observers was 0.03 mm with a standard deviation of 0.11 mm. Over 94% of  
155 measurements made by the 2 observers were within the limits of agreement, as defined  
156 by Bland and Altman.<sup>11</sup>

157

### 158 **Macroscopic assessment of abdominal aortic pathology**

159 Images of explanted abdominal aortas were evaluated by three independent observers,  
160 blinded to experimental group. The observers also had access to the fixed aortic  
161 specimens. If an observer deemed an image ambiguous, the actual specimen was  
162 examined. The observers assessed the presence of abdominal aortic pathology (e.g.,

163 either aortic dilation or apparent intramural blood), and assigned a severity grade to  
164 each aorta. Severity grades were assigned by each observer according to a scale,<sup>12</sup> with  
165 modifications that included addition of a grade of “0” for aortas with no visible  
166 aneurysmal pathology (Figure 2E). Most grades were identical among the 3 observers.  
167 When grades differed, we used the median as the final grade. For grading of abdominal  
168 aortic pathology there was agreement between at least two observers in 68 of 72  
169 specimens (94%). To further assess agreement among abdominal aortic aneurysm  
170 severity scores assigned by different observers, we calculated the weighted kappa  
171 values for the three pairs of observers.<sup>13</sup> These values ranged between 0.7 and 0.8,  
172 indicating moderate to strong agreement. Weighted kappa values comparing the scores  
173 of each of the 3 observers to the final median score were 0.8–1.0. These data suggest  
174 that our abdominal aortic pathology severity scoring system is reproducible and that the  
175 final median score for each aorta agrees strongly with the scores of each of the 3  
176 observers.

### 177 178 **Measurement of ascending aortic external diameter**

179 We measured external diameters of the ascending aortas using en bloc excised  
180 specimens of heart and aorta. We removed the atria from these specimens, exposing  
181 the proximal aorta. The specimens were then placed on the bottom of a silicone-covered  
182 glass dish. The heart and aorta were fixed to the dish by insertion of pins into the heart  
183 and one of the great vessels. As a result, the aorta was apposed to the dish along its  
184 entire length, eliminating the antero-posterior curvature of the ascending aorta and arch.  
185 A ruler was placed adjacent to the aorta and was imaged along with the thoracic aorta.  
186 This image was later used, with computer-assisted planimetry, to measure the external  
187 diameter of the aorta in a plane orthogonal to the major aortic axis. This plane, just  
188 proximal to the takeoff of the innominate artery, is the same location as “Cut 2”, shown  
189 on Supplemental Figure III. Unlike the abdominal aortas, in which dilation was evident in  
190 many specimens but varied in location, there was no evident dilation of the thoracic  
191 aortas. For this reason, we decided to measure all of the thoracic aortas at the single  
192 standardized location described above. Because of a technical error made during  
193 specimen preparation, one mouse in the SMC-specific TBR11 loss group was excluded  
194 from all thoracic aortic assessments.

### 195 196 **Macroscopic assessment of thoracic aortic pathology**

197 Images of explanted thoracic aortas were evaluated by the same three observers.  
198 Because macroscopic pathology in the thoracic aorta was limited to apparent aortic wall  
199 hematoma, we developed a grading system to assess hematoma severity (Figure 3D).  
200 When grades differed, we used the median as the final grade. For grading of thoracic  
201 aorta pathology there was agreement between at least two of the three observers in 69  
202 of 70 specimens (99%). To further assess agreement between thoracic aortic  
203 hematoma severity scores assigned by different observers, we calculated the weighted  
204 kappa values for the three pairs of observers.<sup>13</sup> These values ranged from 0.8 to 0.9,  
205 indicating strong agreement. Weighted kappa values comparing the scores of each of  
206 the 3 observers to the final median score also ranged from 0.8 to 0.9. These data  
207 suggest that our thoracic aortic hematoma severity scoring system is reproducible and  
208 that the final median score for each aorta agrees strongly with the scores of each of the  
209 3 observers

### 210 211 **Tissue processing, sectioning and staining**

212 We used random number generation (random.org) to select a subset of 12 aortas from  
213 each of the 3 groups for histologic analyses. The heart was detached from the aorta by  
214 transverse sectioning of the aorta as close to the heart as possible. The aortas were  
215 then sectioned transversely at a point halfway between the caudal end of the lesser  
216 curvature and a point 0.5 mm cranial to the superior mesenteric artery takeoff (cut 4 in

217 Figure III in the online-only Data Supplement). This segment of thoracic aorta was  
218 sectioned transversely (cuts 2 and 3 in Figure III in the online-only Data Supplement)  
219 into 3 smaller segments. These 3 segments were then trimmed to yield 3 smaller  
220 segments (indicated by rectangles in Figure III in the online-only Data Supplement).  
221 These 3 smaller segments—containing tissue from the ascending thoracic aorta (AscA),  
222 the aortic arch (AR) and the cranial portion of the descending thoracic aorta (cDTA)—  
223 were embedded alongside each other in a single block of optimal cutting temperature  
224 (OCT) compound (#4583; Sacura Finetek USA, Torrance, CA). For all 3 segments, the  
225 edge closest to the aortic valve was placed at the block face at which sectioning was  
226 begun.

227  
228 The caudal portion of the aorta (below cut 4 in Figure III in the online-only Data  
229 Supplement) was cut transversely 0.5 mm cranial to the superior mesenteric artery  
230 takeoff and halfway between the left renal artery and the bifurcation (cuts 5 and 6 in  
231 Figure III in the online-only Data Supplement). The most distal segment (caudal  
232 infrarenal aorta) was discarded. The 2 remaining segments contained: 1) the distal  
233 descending thoracic aorta and part of the suprarenal abdominal aorta; and 2) the  
234 remainder of the suprarenal abdominal aorta, the juxtarenal aorta, and the most cranial  
235 part of the infrarenal aorta. These 2 segments were embedded in a single OCT block  
236 alongside each other. For both segments, the edge created by the cut near the SMA  
237 takeoff (cut 5 in Figure III in the online-only Data Supplement) was placed at the block  
238 face at which sectioning was begun. When sectioned at 5 steps in both directions, the  
239 first 2 steps in both directions were termed cranial abdominal aorta (cAA). The 3 most  
240 cranial sections were termed distal descending thoracic aorta (dDTA), and the 3 most  
241 caudal sections were termed infrarenal aorta (IR).

242  
243 The block containing the AscA, AR, and cDTA was sectioned at 3 steps, each separated  
244 by 150  $\mu\text{m}$ . At each of the 3 steps we cut 12 serial 5- $\mu\text{m}$ -thick sections (3 segments, 3  
245 steps per segment; 12 sections per step = 108 sections with 3 sections per segment =  
246 36 slides). The block containing the dDTA, the cAA, and the IR was sectioned at 5  
247 steps, each separated by 1.9 mm. At each of the 5 steps, we cut 20 serial 5- $\mu\text{m}$ -thick  
248 sections (2 segments, 5 steps per segment, 20 sections per step = 200 sections with 2  
249 sections per segment = 100 slides). Sections were mounted on glass slides (#48311-  
250 703; VWR, Randor, PA), and stored at  $-80\text{ }^{\circ}\text{C}$ .

251  
252 All histologic sections were cut in planes as close to orthogonal as possible in relation to  
253 the major aortic axis. With reference to Supplemental Figure III, segments of cDTA,  
254 dDTA, cAA, and infrarenal aorta were all sectioned orthogonally to the lumen.  
255 Segments of the ascending aorta (AscA) and arch (AR) were slightly curved; therefore,  
256 some sections are cut at small angles to the orthogonal plane. These small angles were  
257 likely consistent among all of the aortas, minimizing opportunity for bias.

258  
259 For hematoxylin and eosin stain, slides were incubated at room temperature for 1 hour,  
260 then stained with eosin y solution (#HT110132-1L; Sigma Aldrich) diluted 1:20 in  
261 deionized water, and counterstained with Gill's hematoxylin solution (#CS400-D;  
262 Thermo-Fisher Scientific). Slides were then washed, dehydrated (95% ethanol),  
263 covered using Permunt medium (#SP15-500; Thermo-Fisher Scientific).

264  
265 Slides were permeabilized with acetone for 10 minutes at  $-20\text{ }^{\circ}\text{C}$ , washed with cold  
266 PBS, and blocked with 3% solution (w/v) of bovine serum albumin in PBS. After  
267 washing in PBS, slides were incubated overnight at  $4\text{ }^{\circ}\text{C}$  with Mac-2 antibody (anti-  
268 galectin 3; diluted 1:500 in 3% BSA solution; #CL8942AP, Cedarlane Labs, Burlington,  
269 NC). Negative controls were stained with nonimmune Rat IgG2b (#MCA6006; AbD  
270 Serotech, Kidlington, UK;) or no primary antibody. Bound antibody was detected with

271 the Vectastain ABC and Nova Red Peroxidase substrate kits (#PK 4000 and #SK-4800;  
272 Vector Labs, Burlingame, CA). Slides were covered using Permount medium, and stored  
273 at room temperature.

274

275 Stained slides were imaged using a microscope and camera (DM4000 B microscope,  
276 DFC295 camera; Leica Microsystems) and images were analyzed using the Image J  
277 software (version 1.48, NIH, Bethesda, MD). Some of the images were converted to 8-  
278 bit format, background signal was removed by thresholding, and the area above  
279 threshold was measured.

280

### 281 **Planimetry**

282 Hematoxylin and eosin-stained sections were illuminated through a fluorescein filter  
283 (Leica Microsystems) to induce autofluorescence of the elastic laminae, and imaged as  
284 described above. An observer blinded to experimental group used Image J software to  
285 measure the circumferences of the internal and external elastic laminae (IEL and EEL,  
286 which are essentially the luminal and outer medial borders) and the outer perimeter of  
287 the adventitia. We calculated average medial thickness, adventitial thickness and lumen  
288 diameter as previously described,<sup>14</sup> by assuming circular in vivo geometry of the IEL,  
289 EEL and outer adventitial circumferences and calculating the differences between the  
290 radii of these circles. To check for inter-observer reproducibility of planimetry  
291 measurements, a second observer re-measured the IEL, EEL, and outer adventitial  
292 circumferences of a subset of randomly chosen sections. Measurements of thoracic  
293 aortic sections ranged from 2.7–4.4 mm (includes measurements of IEL, EEL, and outer  
294 adventitial circumferences), with a mean difference between measurements from the two  
295 observers of 0.06 mm. The standard deviation of these differences was 0.14 mm  
296 (n=24). Measurements made on abdominal aortic sections ranged from 2.4–5.0 mm  
297 (again includes measurements of IEL, EEL, outer adventitial circumferences). The  
298 mean difference between measurements of the two observers was 0.07 mm, and the  
299 standard deviation of these differences was 0.19 mm (n=120). For both thoracic and  
300 abdominal aortic sections, >94% of measurements made by the 2 observers were within  
301 the limits of agreement, as defined by Bland and Altman.<sup>11</sup>

302

### 303 **Aortic protein isolation**

304 Mice were deeply anesthetized with ketamine and xylazine and exsanguinated by saline  
305 perfusion. Aortas were excised, trimmed of periaortic fat, snap-frozen and stored at –80  
306 °C. The aorta was later thawed, opened longitudinally, and pinned lumen-up on a clear  
307 dissection dish. The endothelial layer was scraped away with a cotton swab, a  
308 transverse incision was made through the media with a scalpel, and the medial and  
309 adventitial layers separated with forceps. The media was then placed in liquid nitrogen,  
310 crushed with a liquid nitrogen-chilled steel mortar and pestle, and incubated on ice with  
311 100 µL of complete lysis buffer (#04719956001; Roche Applied Sciences, Penzberg,  
312 Germany) for 30 minutes. The sample was spun at 16,100 x g and the amount of protein  
313 in the supernatant measured with the BCA assay (#23227; Thermo-Pierce).

314

### 315 **Western blotting**

316 For each sample, 7 µg of aortic medial protein was separated with SDS/PAGE  
317 (#NP0335; Invitrogen, Waltham, MA) and transferred to a PVDF membrane (#  
318 IPSN07852; EMD Millipore, Billerica, MA). TBR11 was detected with a rabbit primary  
319 antibody (#SC-4001; 1:1000 dilution; Santa Cruz Antibodies, Santa Cruz, CA) and an  
320 HRP-conjugated anti-rabbit secondary antibody (#170-6515; 1:2000 dilution, Bio Rad,  
321 Hercules, CA). To control for protein loading and transfer, membranes were stripped and  
322 re-probed for either β-actin (#A5316; 1:2000 dilution; Sigma-Aldrich) or GAPDH (#SC-  
323 20357; 1:1000 dilution; Santa Cruz Antibodies), followed by application of HRP-

324 conjugated antibodies to mouse IgG (#170-6516; 1:2000 dilution; Bio Rad) or goat IgG  
325 (#SC-203576; 1:2000 dilution; Santa Cruz Antibodies), respectively.

326

### 327 **Statistics**

328 All statistical analyses were carried out with the SigmaStat software (version 13, Systat  
329 Software Inc., San Jose, CA). Survival curves were compared with the log-rank test.  
330 Categorical data (prevalence of aortic pathology) were compared using the chi-square  
331 RxC contingency table test.<sup>15</sup> Ordinal data (severity of aortic pathology) were compared  
332 using the chi-square test. In experiments with 2 groups (TBR11 expression levels and  
333 antibody-mediated blockade of TGF- $\beta$ ), continuous data were compared by t-test after  
334 confirming normality and equal variances of the groups. In the first experiment testing  
335 whether increasing doses of anti-TGF- $\beta$  antibody (clone 2G7) reduced the amount of  
336 serum TGF- $\beta$ , we used a one-tailed t-test because we anticipated (from previous studies  
337 and our own preliminary in vitro experiments) the direction of the effect. In later  
338 experiments testing whether 2G7 blocks TGF- $\beta$ 1, - $\beta$ 2, and - $\beta$ 3, we used a two-tailed t-  
339 test. In experiments with 3 groups and continuous data we used one-way analysis of  
340 variance (ANOVA). If the P value was < 0.05 we used Dunnett's test to compare each of  
341 the 2 experimental groups to the control group. Group data are shown as mean  $\pm$  SEM.  
342 Continuous data that failed to meet the criteria for normal distribution and equal variance  
343 were analyzed using the Kruskal-Wallis one-way ANOVA on ranks test. If the P value of  
344 this ANOVA was less than 0.05, each of the two experimental groups was compared to  
345 the control group using Dunn's method for post-hoc correction for pairwise comparisons.  
346 Inter-observer reproducibility of IEL, EEL and outer adventitial circumference  
347 measurements was assessed by calculating the mean difference and limits of  
348 agreement for measurements made by two observers.<sup>11</sup> Reproducibility of observers'  
349 thoracic and abdominal aortic pathology severity scores was assessed by calculating  
350 weighted kappa scores for each pair of observers and for each observer's scores  
351 compared to the final median score.<sup>13</sup>

352

### 353 **References for Materials and Methods**

- 354 1. Wendling O, Bornert JM, Chambon P, Metzger D. Efficient temporally-controlled  
355 targeted mutagenesis in smooth muscle cells of the adult mouse. *Genesis*.  
356 2009;**47**:14–18
- 357 2. Leveen P, Larsson J, Ehinger M, Cilio CM, Sundler M, Sjostrand LJ, Holmdahl R,  
358 Karlsson S. Induced disruption of the transforming growth factor beta type II  
359 receptor gene in mice causes a lethal inflammatory disorder that is  
360 transplantable. *Blood*. 2002;**100**:560–568
- 361 3. Soriano P. Generalized lacZ expression with the rosa26 cre reporter strain. *Nat*.  
362 *Genet*. 1999;**21**:70–71
- 363 4. Wirth A, Benyo Z, Lukasova M, Leutgeb B, Wettschureck N, Gorbey S, Orsy P,  
364 Horvath B, Maser-Gluth C, Greiner E, Lemmer B, Schutz G, Gutkind JS,  
365 Offermanns S. G12-g13-larg-mediated signaling in vascular smooth muscle is  
366 required for salt-induced hypertension. *Nat. Med*. 2008;**14**:64–68
- 367 5. Wei H, Hu JH, Angelov SN, Fox K, Yan J, Enstrom R, Smith A, Dichek DA.  
368 Aortopathy in a mouse model of marfan syndrome is not mediated by altered  
369 transforming growth factor beta signaling. *J Am Heart Assoc*. 2017;**6**
- 370 6. Herring BP, Hoggatt AM, Burlak C, Offermanns S. Previously differentiated  
371 medial vascular smooth muscle cells contribute to neointima formation following  
372 vascular injury. *Vasc Cell*. 2014;**6**:21

- 373 7. Daugherty A, Manning MW, Cassis LA. Angiotensin II promotes atherosclerotic  
374 lesions and aneurysms in apolipoprotein e-deficient mice. *J. Clin. Invest.*  
375 2000;**105**:1605–1612
- 376 8. King VL, Lin AY, Kristo F, Anderson TJ, Ahluwalia N, Hardy GJ, Owens AP, 3rd,  
377 Howatt DA, Shen D, Tager AM, Luster AD, Daugherty A, Gerszten RE.  
378 Interferon-gamma and the interferon-inducible chemokine cxcl10 protect against  
379 aneurysm formation and rupture. *Circulation.* 2009;**119**:426–435
- 380 9. Lucas C, Bald LN, Fendly BM, Mora-Worms M, Figari IS, Patzer EJ, Palladino  
381 MA. The autocrine production of transforming growth factor-beta 1 during  
382 lymphocyte activation. A study with a monoclonal antibody-based elisa. *J.*  
383 *Immunol.* 1990;**145**:1415–1422
- 384 10. Wang Y, Ait-Oufella H, Herbin O, Bonnin P, Ramkhelawon B, Taleb S, Huang J,  
385 Offenstadt G, Combadiere C, Renia L, Johnson JL, Tharaux PL, Tedgui A, Mallat  
386 Z. Tgf-beta activity protects against inflammatory aortic aneurysm progression  
387 and complications in angiotensin ii-infused mice. *J. Clin. Invest.* 2010;**120**:422–  
388 432
- 389 11. Bland JM, Altman DG. Statistical methods for assessing agreement between two  
390 methods of clinical measurement. *Lancet.* 1986;**1**:307-310
- 391 12. Daugherty A, Manning MW, Cassis LA. Antagonism of at2 receptors augments  
392 angiotensin II-induced abdominal aortic aneurysms and atherosclerosis. *Br. J.*  
393 *Pharmacol.* 2001;**134**:865–870
- 394 13. Cohen J. A coefficient of agreement for nominal scales. *Educational and*  
395 *Psychological Measurement.* 1960;**20**:37–46
- 396 14. Hu JH, Wei H, Jaffe M, Airhart N, Du L, Angelov SN, Yan J, Allen JK, Kang I,  
397 Wight TN, Fox K, Smith A, Enstrom R, Dichek DA. Postnatal deletion of the type  
398 II transforming growth factor-beta receptor in smooth muscle cells causes severe  
399 aortopathy in mice. *Arterioscler. Thromb. Vasc. Biol.* 2015;**35**:2647–2656
- 400 15. Armitage P, Berry G. *Statistical methods in medical research.* Oxford, UK:  
401 Blackwell; 1994.

402
